# Supplementary material for: Quantitative analysis of the human ovarian carcinoma mitochondrial phosphoproteome
Source: Aging (Albany NY). 2019 Aug 22;11(16):6449–68. doi: 10.18632/aging.102199 (PMC6738437; doi:10.18632/aging.102199)
Supplement: Supplementary Table 1 [file aging-11-102199-s001.xls]

## Sheet: Sheet1
Supplementary Table 1. GO analysis revealed statistically significantly biological processes (BPs), cellular components (CCs), and molecular functions (MFs) that were involved in identified phosphoproteins.
GO ID	GO Term	Ontology Source	Group P-Value	Group P Value Corrected with Benjamini-Hochberg	Associated Genes
GO:1903959	regulation of anion transmembrane transport	GO_BiologicalProcess	0.000395626	0.000989065	[VDAC1, VDAC2, VDAC3]
GO:0000422	autophagy of mitochondrion	GO_BiologicalProcess	0.00419665	0.00524582	[BNIP3L, U2AF2, VDAC1]
GO:0061726	mitochondrion disassembly	GO_BiologicalProcess	0.00419665	0.00524582	[BNIP3L, U2AF2, VDAC1]
GO:1903146	regulation of autophagy of mitochondrion	GO_BiologicalProcess	0.00419665	0.00524582	[BNIP3L, U2AF2, VDAC1]
GO:0071806	protein transmembrane transport	GO_BiologicalProcess	0.000508312	0.000847187	[HSPD1, TOMM20, TOMM22]
GO:0065002	intracellular protein transmembrane transport	GO_BiologicalProcess	0.000508312	0.000847187	[HSPD1, TOMM20, TOMM22]
GO:0006626	protein targeting to mitochondrion	GO_BiologicalProcess	0.000508312	0.000847187	[BNIP3L, HSPD1, TOMM20, TOMM22, U2AF2]
GO:0044743	protein transmembrane import into intracellular organelle	GO_BiologicalProcess	0.000508312	0.000847187	[HSPD1, TOMM20, TOMM22]
GO:0043243	positive regulation of protein complex disassembly	GO_BiologicalProcess	0.00432161	0.00432161	[CFL1, CFL2, DSTN]
GO:1901879	regulation of protein depolymerization	GO_BiologicalProcess	0.00432161	0.00432161	[CFL1, CFL2, DSTN]
GO:0030042	actin filament depolymerization	GO_BiologicalProcess	0.00432161	0.00432161	[CFL1, CFL2, DSTN]
GO:1901881	positive regulation of protein depolymerization	GO_BiologicalProcess	0.00432161	0.00432161	[CFL1, CFL2, DSTN]
GO:0030043	actin filament fragmentation	GO_BiologicalProcess	0.00432161	0.00432161	[CFL1, CFL2, DSTN]
GO:0030834	regulation of actin filament depolymerization	GO_BiologicalProcess	0.00432161	0.00432161	[CFL1, CFL2, DSTN]
GO:0030836	positive regulation of actin filament depolymerization	GO_BiologicalProcess	0.00432161	0.00432161	[CFL1, CFL2, DSTN]
GO:0030048	actin filament-based movement	GO_BiologicalProcess	8.96266e-05	0.000448133	[ATP2A2, CAV1, MYH10, MYH9, PKP2]
GO:0098900	regulation of action potential	GO_BiologicalProcess	8.96266e-05	0.000448133	[ATP2A2, CAV1, PKP2]
GO:0007009	plasma membrane organization	GO_BiologicalProcess	8.96266e-05	0.000448133	[ATP2A2, CAV1, EHD2]
GO:0098901	regulation of cardiac muscle cell action potential	GO_BiologicalProcess	8.96266e-05	0.000448133	[ATP2A2, CAV1, PKP2]
GO:1903115	regulation of actin filament-based movement	GO_BiologicalProcess	8.96266e-05	0.000448133	[ATP2A2, CAV1, PKP2]
GO:0086001	cardiac muscle cell action potential	GO_BiologicalProcess	8.96266e-05	0.000448133	[ATP2A2, CAV1, PKP2]
GO:0002027	regulation of heart rate	GO_BiologicalProcess	8.96266e-05	0.000448133	[ATP2A2, CAV1, PKP2]
GO:0016264	gap junction assembly	GO_BiologicalProcess	8.96266e-05	0.000448133	[CAV1, CTNNA1, PKP2]
GO:0086003	cardiac muscle cell contraction	GO_BiologicalProcess	8.96266e-05	0.000448133	[ATP2A2, CAV1, PKP2]
GO:0006942	regulation of striated muscle contraction	GO_BiologicalProcess	8.96266e-05	0.000448133	[ATP2A2, CAV1, PKP2]
GO:0055117	regulation of cardiac muscle contraction	GO_BiologicalProcess	8.96266e-05	0.000448133	[ATP2A2, CAV1, PKP2]
GO:0086004	regulation of cardiac muscle cell contraction	GO_BiologicalProcess	8.96266e-05	0.000448133	[ATP2A2, CAV1, PKP2]
GO:0005851	eukaryotic translation initiation factor 2B complex	GO_CellularComponent	0.0198228	0.033038	[EIF2B5]
GO:0005952	cAMP-dependent protein kinase complex	GO_CellularComponent	0.0295887	0.0369859	[PRKAR2A]
GO:0070939	Dsl1/NZR complex	GO_CellularComponent	0.00996019	0.0298806	[NBAS]
GO:0005850	eukaryotic translation initiation factor 2 complex	GO_CellularComponent	0.0132585	0.0331463	[EIF2S2]
GO:0016281	eukaryotic translation initiation factor 4F complex	GO_CellularComponent	0.0295887	0.0369859	[EIF4G3]
GO:0019773	proteasome core complex, alpha-subunit complex	GO_CellularComponent	0.0263441	0.0359238	[PSMA3]
GO:0022625	cytosolic large ribosomal subunit	GO_CellularComponent	0.0192745	0.0361397	[RPLP0, RPLP2]
GO:0089701	U2AF	GO_CellularComponent	0.0488344	0.0488344	[U2AF2]
GO:0000243	commitment complex	GO_CellularComponent	0.0488344	0.0488344	[U2AF2]
GO:0097425	smooth endoplasmic reticulum part	GO_CellularComponent	0.0230888	0.0346332	[PGRMC1]
GO:0030868	smooth endoplasmic reticulum membrane	GO_CellularComponent	0.0230888	0.0346332	[PGRMC1]
GO:0030062	mitochondrial tricarboxylic acid cycle enzyme complex	GO_CellularComponent	0.0198228	0.033038	[BCKDHA]
GO:0005947	mitochondrial alpha-ketoglutarate dehydrogenase complex	GO_CellularComponent	0.0198228	0.033038	[BCKDHA]
GO:0001674	female germ cell nucleus	GO_CellularComponent	0.016546	0.0354558	[MARCKS]
GO:0042585	germinal vesicle	GO_CellularComponent	0.016546	0.0354558	[MARCKS]
GO:0046696	lipopolysaccharide receptor complex	GO_CellularComponent	0.0424613	0.0454942	[HSPD1]
GO:0019907	cyclin-dependent protein kinase activating kinase holoenzyme complex	GO_CellularComponent	0.0424613	0.0454942	[HSPD1]
GO:0000792	heterochromatin	GO_CellularComponent	0.000371015	0.00139131	[HIST1H1E, HMGA1, PSIP1]
GO:0035327	transcriptionally active chromatin	GO_CellularComponent	0.000371015	0.00139131	[HIST1H1C, PSIP1]
GO:0035985	senescence-associated heterochromatin focus	GO_CellularComponent	0.000371015	0.00139131	[HMGA1]
GO:0005720	nuclear heterochromatin	GO_CellularComponent	0.000371015	0.00139131	[HIST1H1E, PSIP1]
GO:0046930	pore complex	GO_CellularComponent	3.32377e-05	0.000249283	[VDAC1, VDAC2, VDAC3]
GO:0031968	organelle outer membrane	GO_CellularComponent	3.32377e-05	0.000249283	[BNIP3L, RMDN3, TOMM20, TOMM22, VDAC1, VDAC2, VDAC3]
GO:0042645	mitochondrial nucleoid	GO_CellularComponent	3.32377e-05	0.000249283	[VDAC1, VDAC2]
GO:0005757	mitochondrial permeability transition pore complex	GO_CellularComponent	3.32377e-05	0.000249283	[VDAC1]
GO:0005741	mitochondrial outer membrane	GO_CellularComponent	3.32377e-05	0.000249283	[BNIP3L, RMDN3, TOMM20, TOMM22, VDAC1, VDAC2, VDAC3]
GO:0044233	ER-mitochondrion membrane contact site	GO_CellularComponent	0.0298829	0.0344802	[TOMM20]
GO:0098573	intrinsic component of mitochondrial membrane	GO_CellularComponent	0.0298829	0.0344802	[TOMM20, TOMM22]
GO:0098799	outer mitochondrial membrane protein complex	GO_CellularComponent	0.0298829	0.0344802	[TOMM20, TOMM22]
GO:0005742	mitochondrial outer membrane translocase complex	GO_CellularComponent	0.0298829	0.0344802	[TOMM20, TOMM22]
GO:0031306	intrinsic component of mitochondrial outer membrane	GO_CellularComponent	0.0298829	0.0344802	[TOMM20, TOMM22]
GO:0032592	integral component of mitochondrial membrane	GO_CellularComponent	0.0298829	0.0344802	[TOMM20, TOMM22]
GO:0031307	integral component of mitochondrial outer membrane	GO_CellularComponent	0.0298829	0.0344802	[TOMM20, TOMM22]
GO:0044291	cell-cell contact zone	GO_CellularComponent	1.84323e-05	0.000276485	[ATP2A2, CTNNA1, PKP2]
GO:0014704	intercalated disc	GO_CellularComponent	1.84323e-05	0.000276485	[ATP2A2, CTNNA1, PKP2]
GO:0005915	zonula adherens	GO_CellularComponent	1.84323e-05	0.000276485	[CTNNA1]
GO:0044853	plasma membrane raft	GO_CellularComponent	1.84323e-05	0.000276485	[CAV1, CTNNA1, EHD2, PRKAR2A]
GO:0031095	platelet dense tubular network membrane	GO_CellularComponent	1.84323e-05	0.000276485	[ATP2A2]
GO:0005901	caveola	GO_CellularComponent	1.84323e-05	0.000276485	[CAV1, CTNNA1, EHD2]
GO:0016529	sarcoplasmic reticulum	GO_CellularComponent	1.84323e-05	0.000276485	[ANK1, ATP2A2]
GO:0014731	spectrin-associated cytoskeleton	GO_CellularComponent	1.84323e-05	0.000276485	[ANK1]
GO:0014801	longitudinal sarcoplasmic reticulum	GO_CellularComponent	1.84323e-05	0.000276485	[ATP2A2]
GO:0016600	flotillin complex	GO_CellularComponent	1.84323e-05	0.000276485	[CTNNA1]
GO:0090534	calcium ion-transporting ATPase complex	GO_CellularComponent	1.84323e-05	0.000276485	[ATP2A2]
GO:0034098	VCP-NPL4-UFD1 AAA ATPase complex	GO_CellularComponent	1.84323e-05	0.000276485	[CAV1]
GO:0032153	cell division site	GO_CellularComponent	0.000196814	0.000984068	[MYH10, MYH9]
GO:0060187	cell pole	GO_CellularComponent	0.000196814	0.000984068	[VANGL2]
GO:0070938	contractile ring	GO_CellularComponent	0.000196814	0.000984068	[MYH9]
GO:0032155	cell division site part	GO_CellularComponent	0.000196814	0.000984068	[MYH10, MYH9]
GO:0097610	cell surface furrow	GO_CellularComponent	0.000196814	0.000984068	[MYH10, MYH9]
GO:0032154	cleavage furrow	GO_CellularComponent	0.000196814	0.000984068	[MYH10, MYH9]
GO:0032432	actin filament bundle	GO_CellularComponent	0.000196814	0.000984068	[MARCKS, MYH10, MYH9, VANGL2]
GO:0042641	actomyosin	GO_CellularComponent	0.000196814	0.000984068	[MYH10, MYH9, VANGL2]
GO:0016460	myosin II complex	GO_CellularComponent	0.000196814	0.000984068	[MYH10, MYH9]
GO:0032982	myosin filament	GO_CellularComponent	0.000196814	0.000984068	[MYH10, MYH9]
GO:0005826	actomyosin contractile ring	GO_CellularComponent	0.000196814	0.000984068	[MYH9]
GO:0030863	cortical cytoskeleton	GO_CellularComponent	0.000196814	0.000984068	[CFL1, DSTN, MYH9]
GO:0030864	cortical actin cytoskeleton	GO_CellularComponent	0.000196814	0.000984068	[CFL1, DSTN, MYH9]
GO:0097517	contractile actin filament bundle	GO_CellularComponent	0.000196814	0.000984068	[MYH10, MYH9, VANGL2]
GO:0001725	stress fiber	GO_CellularComponent	0.000196814	0.000984068	[MYH10, MYH9, VANGL2]
GO:0097513	myosin II filament	GO_CellularComponent	0.000196814	0.000984068	[MYH10, MYH9]
GO:0034186	apolipoprotein A-I binding	GO_MolecularFunction	0.0138076	0.0220921	[HSPD1]
GO:0051015	actin filament binding	GO_MolecularFunction	1.41532e-06	2.26451e-05	[CFL1, CFL2, CTNNA1, DSTN, MARCKS, MYH10, MYH9]
GO:0097100	supercoiled DNA binding	GO_MolecularFunction	0.0172301	0.0212062	[PSIP1]
GO:0008603	cAMP-dependent protein kinase regulator activity	GO_MolecularFunction	0.0240401	0.0256427	[PRKAR2A]
GO:0017166	vinculin binding	GO_MolecularFunction	0.000638129	0.00510503	[CTNNA1, SORBS3]
GO:0030628	pre-mRNA 3'-splice site binding	GO_MolecularFunction	0.0240401	0.0256427	[U2AF2]
GO:0008135	translation factor activity, RNA binding	GO_MolecularFunction	0.00364886	0.00973028	[EIF2B5, EIF2S2, EIF4G3]
GO:0003743	translation initiation factor activity	GO_MolecularFunction	0.00364886	0.00973028	[EIF2B5, EIF2S2, EIF4G3]
GO:0000033	alpha-1,3-mannosyltransferase activity	GO_MolecularFunction	0.0138076	0.0220921	[ALG3]
GO:0052925	dol-P-Man:Man(5)GlcNAc(2)-PP-Dol alpha-1,3-mannosyltransferase activity	GO_MolecularFunction	0.0138076	0.0220921	[ALG3]
GO:0031775	lutropin-choriogonadotropic hormone receptor binding	GO_MolecularFunction	0.00346961	0.0111028	[ATP2A2]
GO:0086039	calcium-transporting ATPase activity involved in regulation of cardiac muscle cell membrane potential	GO_MolecularFunction	0.00346961	0.0111028	[ATP2A2]
GO:0086083	cell adhesive protein binding involved in bundle of His cell-Purkinje myocyte communication	GO_MolecularFunction	0.0145629	0.0211824	[PKP2]
GO:0005080	protein kinase C binding	GO_MolecularFunction	0.0145629	0.0211824	[MARCKS, PKP2]
GO:0016724	oxidoreductase activity, oxidizing metal ions, oxygen as acceptor	GO_MolecularFunction	0.0206409	0.0235896	[FTMT]
GO:0004322	ferroxidase activity	GO_MolecularFunction	0.0206409	0.0235896	[FTMT]
GO:0001160	transcription termination site DNA binding	GO_MolecularFunction	0.0138076	0.0220921	[XRN2]
GO:0004534	5'-3' exoribonuclease activity	GO_MolecularFunction	0.0138076	0.0220921	[XRN2]
GO:0001147	transcription termination site sequence-specific DNA binding	GO_MolecularFunction	0.0138076	0.0220921	[XRN2]
GO:0003826	alpha-ketoacid dehydrogenase activity	GO_MolecularFunction	0.0274276	0.0274276	[BCKDHA]
GO:0016624	oxidoreductase activity, acting on the aldehyde or oxo group of donors, disulfide as acceptor	GO_MolecularFunction	0.0274276	0.0274276	[BCKDHA]
GO:0003863	3-methyl-2-oxobutanoate dehydrogenase (2-methylpropanoyl-transferring) activity	GO_MolecularFunction	0.0274276	0.0274276	[BCKDHA]
GO:0032934	sterol binding	GO_MolecularFunction	0.0156245	0.0208326	[CAV1, OSBP]
GO:0008142	oxysterol binding	GO_MolecularFunction	0.0156245	0.0208326	[OSBP]
GO:0070320	inward rectifier potassium channel inhibitor activity	GO_MolecularFunction	0.0156245	0.0208326	[CAV1]
GO:0032552	deoxyribonucleotide binding	GO_MolecularFunction	0.0012984	0.00692479	[HIST1H1E]
GO:0032554	purine deoxyribonucleotide binding	GO_MolecularFunction	0.0012984	0.00692479	[HIST1H1E]
GO:0032558	adenyl deoxyribonucleotide binding	GO_MolecularFunction	0.0012984	0.00692479	[HIST1H1E]
GO:0032564	dATP binding	GO_MolecularFunction	0.0012984	0.00692479	[HIST1H1E]
GO:0043531	ADP binding	GO_MolecularFunction	0.0012984	0.00692479	[HIST1H1E, MYH10, MYH9]
GO:0000146	microfilament motor activity	GO_MolecularFunction	0.0012984	0.00692479	[MYH10, MYH9]
GO:0022884	macromolecule transmembrane transporter activity	GO_MolecularFunction	0.0111088	0.019749	[TOMM20, TOMM22]
GO:0042887	amide transmembrane transporter activity	GO_MolecularFunction	0.0111088	0.019749	[TOMM20, TOMM22]
GO:1904680	peptide transmembrane transporter activity	GO_MolecularFunction	0.0111088	0.019749	[TOMM20, TOMM22]
GO:0008320	protein transmembrane transporter activity	GO_MolecularFunction	0.0111088	0.019749	[TOMM20, TOMM22]
GO:0030943	mitochondrion targeting sequence binding	GO_MolecularFunction	0.0111088	0.019749	[TOMM20]
GO:0015266	protein channel activity	GO_MolecularFunction	0.0111088	0.019749	[TOMM20, TOMM22]
GO:0016667	oxidoreductase activity, acting on a sulfur group of donors	GO_MolecularFunction	0.00594608	0.013591	[SQOR, TMX1]
GO:0016860	intramolecular oxidoreductase activity	GO_MolecularFunction	0.00594608	0.013591	[PTGES3, TMX1]
GO:0016672	oxidoreductase activity, acting on a sulfur group of donors, quinone or similar compound as acceptor	GO_MolecularFunction	0.00594608	0.013591	[SQOR]
GO:0050220	prostaglandin-E synthase activity	GO_MolecularFunction	0.00594608	0.013591	[PTGES3]
GO:0070224	sulfide:quinone oxidoreductase activity	GO_MolecularFunction	0.00594608	0.013591	[SQOR]
GO:0003720	telomerase activity	GO_MolecularFunction	0.00594608	0.013591	[PTGES3]
GO:0016708	oxidoreductase activity, acting on paired donors, with incorporation or reduction of molecular oxygen, NAD(P)H as one donor, and incorporation of two atoms of oxygen into one donor	GO_MolecularFunction	0.00976182	0.0195236	[VDAC2]
GO:0047726	iron-cytochrome-c reductase activity	GO_MolecularFunction	0.00976182	0.0195236	[VDAC2]
GO:0004128	cytochrome-b5 reductase activity, acting on NAD(P)H	GO_MolecularFunction	0.00976182	0.0195236	[VDAC2]
GO:0008941	nitric oxide dioxygenase activity	GO_MolecularFunction	0.00976182	0.0195236	[VDAC2]
GO:0022829	wide pore channel activity	GO_MolecularFunction	0.00976182	0.0195236	[VDAC1, VDAC2, VDAC3]
GO:0005253	anion channel activity	GO_MolecularFunction	0.00976182	0.0195236	[VDAC1, VDAC2, VDAC3]
GO:0015288	porin activity	GO_MolecularFunction	0.00976182	0.0195236	[VDAC1, VDAC2, VDAC3]
GO:0008308	voltage-gated anion channel activity	GO_MolecularFunction	0.00976182	0.0195236	[VDAC1, VDAC2, VDAC3]
GO:0016835	carbon-oxygen lyase activity	GO_MolecularFunction	0.0024205	0.00968199	[HACD3, HMGA1, PUS1]
GO:0051575	5'-deoxyribose-5-phosphate lyase activity	GO_MolecularFunction	0.0024205	0.00968199	[HMGA1]
GO:0016836	hydro-lyase activity	GO_MolecularFunction	0.0024205	0.00968199	[HACD3, PUS1]
GO:0004730	pseudouridylate synthase activity	GO_MolecularFunction	0.0024205	0.00968199	[PUS1]
GO:0018812	3-hydroxyacyl-CoA dehydratase activity	GO_MolecularFunction	0.0024205	0.00968199	[HACD3]
GO:0102158	very-long-chain 3-hydroxyacyl-CoA dehydratase activity	GO_MolecularFunction	0.0024205	0.00968199	[HACD3]
GO:0102343	3-hydroxy-arachidoyl-CoA dehydratase activity	GO_MolecularFunction	0.0024205	0.00968199	[HACD3]
GO:0102344	3-hydroxy-behenoyl-CoA dehydratase activity	GO_MolecularFunction	0.0024205	0.00968199	[HACD3]
GO:0102345	3-hydroxy-lignoceroyl-CoA dehydratase activity	GO_MolecularFunction	0.0024205	0.00968199	[HACD3]
